# Supplementary material for: Bridging the Gap in Headache Care : A Qualitative Needs Assessment for Primary Care Education in Indonesia
Source: Research Square preprint supplement (doi:10.21203/rs.3.rs-8091782/v1), 2026-01-14
Supplement: Supplementary file 1 [file 8a9ae0efe77db8ce23af9318.docx]

**NEEDS ASSESSMENT FOR A HEADACHE MODULE IN INDONESIAN PRIMARY CARE SETTING:THEMATIC ANALYSIS OF STAKEHOLDER PERSPECTIVES**

**Supplement 1.** In-depth interview questions

| **Questions** |
| --- |
| 1. How are the Continuing Professional Development (CPD) activities organized? For example, how are ideas collected, content determined, credit point weight calculated, and the technical implementation conducted? |
| 1. Are these activities aligned as a continuation of competencies taught in undergraduate medical education? |
| 1. What CPD activities have been conducted by the Jakarta branch of the Indonesian Neurological Association? |
| 1. Among those activities, what proportion focused on headache? |
| 1. Of the CPD activities on headache, which ones are accessible for general practitioners to participate in? |
| 1. Are there any headache-related CPD activities specifically designed in content and method for general practitioners, or are they generally open for both general practitioners and specialists? |
| 1. If not, what is the reason? |
| 1. If yes, can the content and method of the headache CPD for general practitioners be further explained? |
| 1. What clinical aspects of headache are considered essential by the professional organization and neurologists for general practitioners to master, but are currently lacking? |

**Supplement 2.** FGD Questions

| **Question type** | **Description** |
| --- | --- |
| **Opening questions** | How often do you encounter headache cases in your daily practice?  What types of headache diagnoses do you most frequently encounter? |
| **Diagnosis** | In your opinion, what are the supporting and hindering factors in diagnosing headache? (Using the 5M framework: Man, Machine, Material, Money, Method)   - Do you experience difficulties in diagnosing headaches? What kind of challenges? - What are the internal (e.g., knowledge, confidence) and external (e.g., infrastructure, referral system) factors involved? |
|  | How confident are you in diagnosing headache on a scale of 1 to 10:   - Why did you give that score? - What do you feel is still lacking? - What efforts have you made to improve your confidence? |
|  | What are the supporting and hindering factors in performing headache anamnesis?   - What do you usually ask during headache history taking? (e.g., present illness, past history, family history, social history) - Do you face challenges in taking headache history? If not, what makes it easier? |
|  | What are the supporting and hindering factors in conducting physical examinations for headache?   - Do you perform physical examinations when assessing headache? What components do you check? - Do you face any challenges in performing PE? If so, what are they? |
|  | What clinical guidelines do you use when diagnosing a headache?   - Are you familiar with the ICHD classification? - If yes, how do you use it in practice? - If not, how do you usually reach a diagnosis? Do you specify the type of headache or just label it generally?   Are you familiar with the diagnosis of Medication Overuse Headache?  Have you ever encountered Medication Overuse Headache in your clinical practice? |
| **Management** | How do you treat patients with headaches?   - What references or guidelines do you use? - Are the recommended medications available at your primary care facility? - What are the supporting and hindering factors in providing treatment? - Do you often prescribe acute headache medication? How often? What are they? Can you describe it? - Do you often prescribe preventive headache medication? How often? What are they? Can you describe it?   In particular, how do you treat patients with Medication Overuse Headache   - Are you aware of MOH among your patients complaining of headache? - If yes, how do you address / treat MOH? |
| **Referral** | How do you refer patients with headaches?   - Have you ever made a referral of headache cases? If yes, what were the reasons? - How big is the proportion of referred patients? - What is the average wait time for specialist referral? Do you find them a problem you face in daily settings? - Was it due to medication unavailability, diagnostic limitations, or others? - Approximately what proportion of your headache patients do you refer to? - What are the typical referral diagnoses? - Have you ever gotten your referral rejected? If yes, what were the reasons? (please include them if it makes sense in Indonesia) - What kind of education or training (from undergraduate studies, CME, webinars, workshops, etc.) have you received on the diagnosis and management of headache? |
| **Monitoring** | Do you find these criteria useful and applicable for monitoring headaches with limited duration of patient encounter?   1. Dromal 2. Provocative factors 3. Palliative factors 4. Characteristics 5. Region 6. Severity level and functional status 7. Temporality 8. Accompanying symptoms 9. Biopsychosocial factors |
| **Proposed CPD format** | If a headache module (covering diagnosis and management) were to be developed for primary care doctors, what would you suggest in terms of content and format?  What benefits do you expect from such a module?  Do you have any other comments or suggestions? |
